# Supplementary material for: Bergamottin promotes osteoblast differentiation and bone formation via activating the Wnt/β-catenin signaling pathway
Source: Royal Society of Chemistry journal article supplement (doi:10.1039/d1fo02755g), 2022-01-01
Supplement: d1fo02755g2.pdf [file d1fo02755g2.pdf]

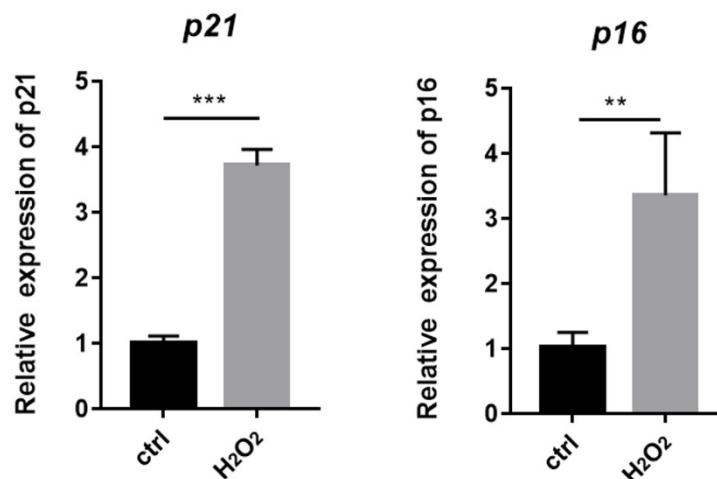

**Supplementary Fig 1.** The expression of *p16* and *p21* in MC3T3-E1 cells after treatment with H<sub>2</sub>O<sub>2</sub>. All bar charts are presented as mean ± SD. \*\**p* < 0.01, \*\*\**p* < 0.001.

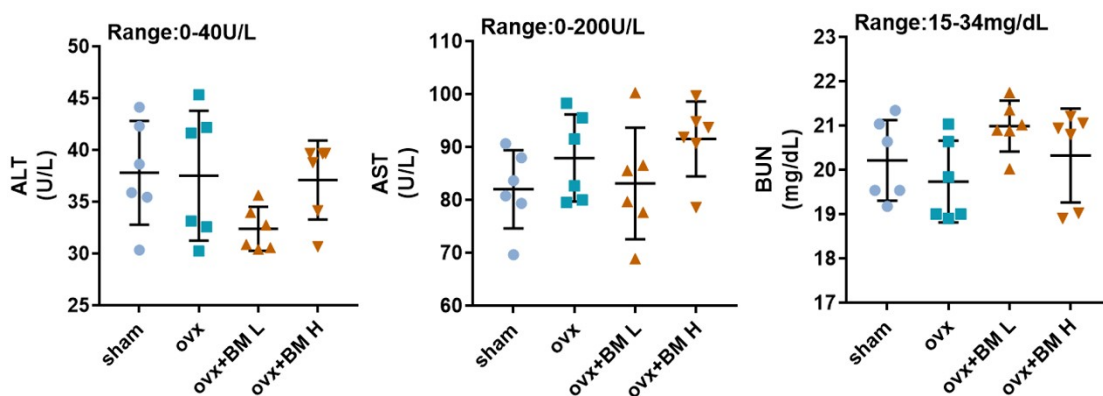

**Supplementary Fig 2.** Blood chemistry profiles to evaluate the alterations of BM on the liver and kidney functions. The markers of liver and kidney functions tested including alanine aminotransferase (ALT), aspartate aminotransferase (AST) and urea nitrogen (BUN) were within the normal ranges.
