# Supplementary figures and images for: Bergamottin promotes osteoblast differentiation and bone formation via activating the Wnt/β-catenin signaling pathway
Source: Royal Society of Chemistry journal article supplement (doi:10.1039/d1fo02755g), 2022-01-01

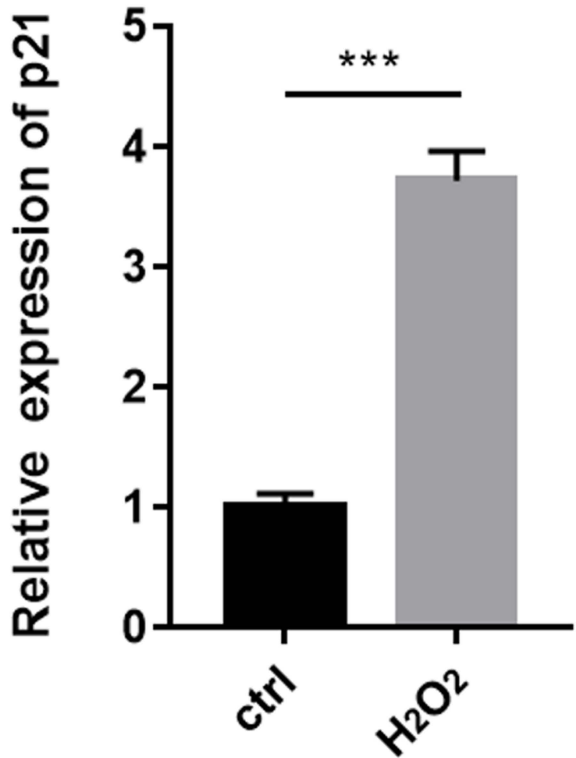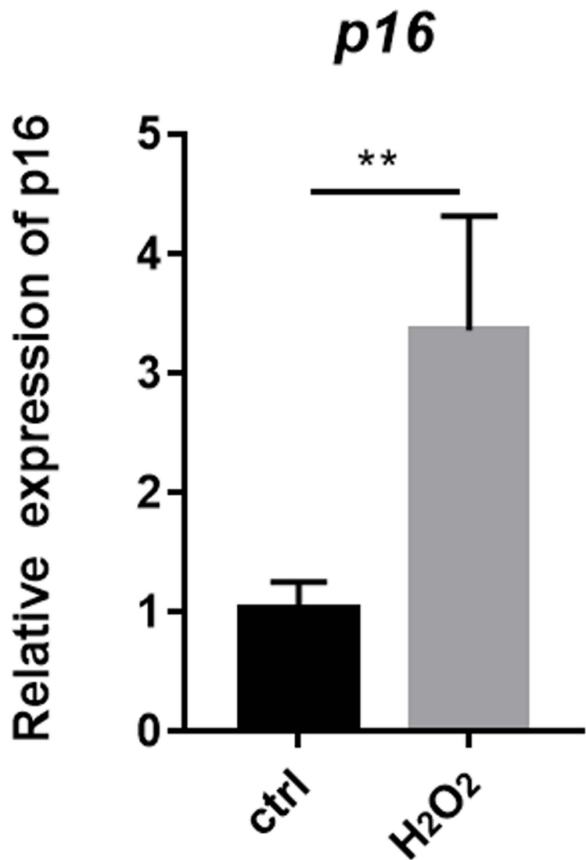

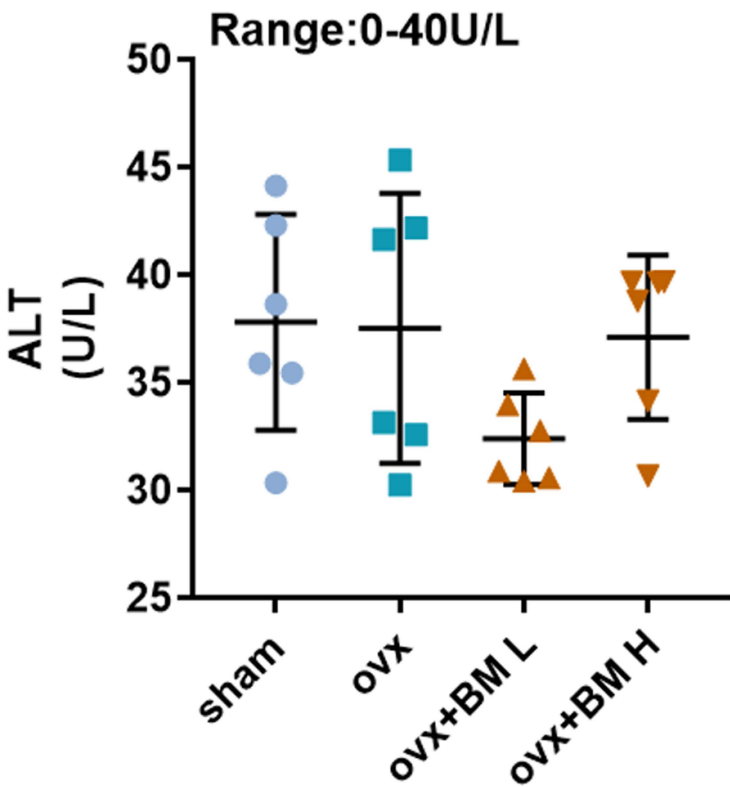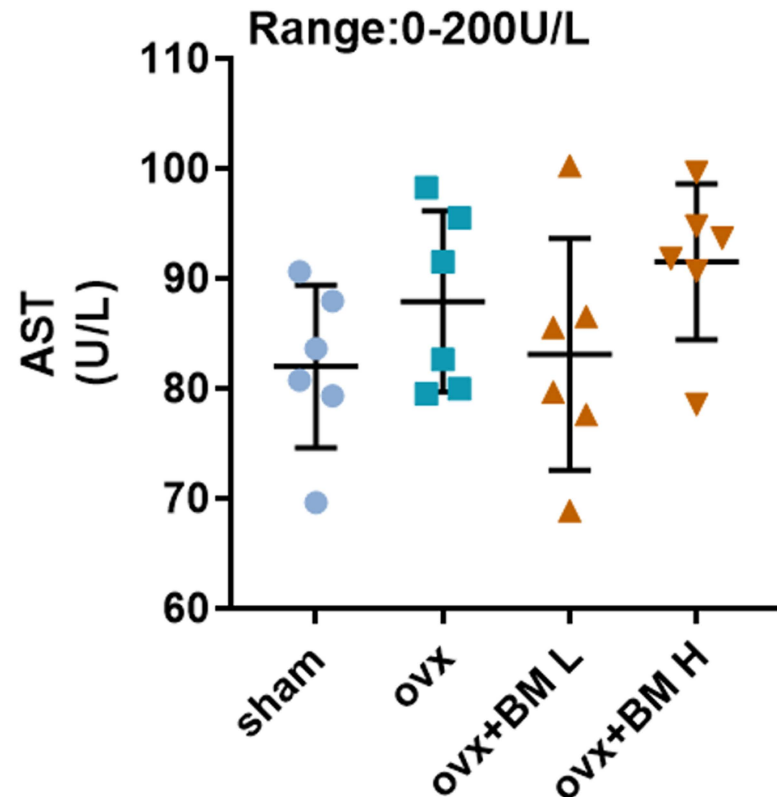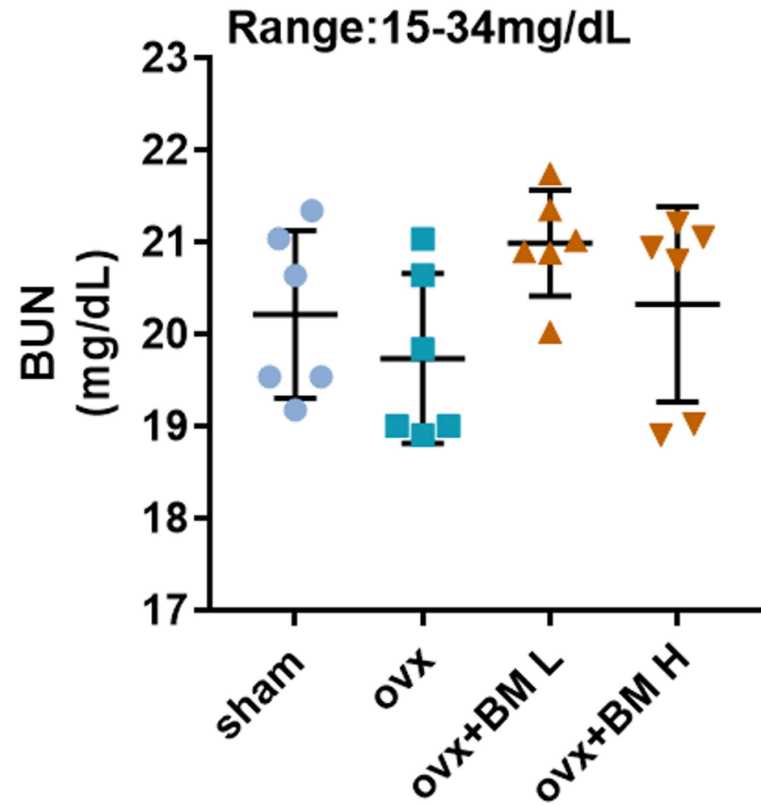

Supplement: d1fo02755g1.pdf [file d1fo02755g1.pdf]
